# Supplementary material for: Differential Mechanisms of Myocardial Conduction Slowing by Adipose Tissue‐Derived Stromal Cells Derived from Different Species
Source: PubMed Central journal article supplement (PMC5442737; doi:10.5966/sctm.2015-0415), 2016-08-02
Supplement: SCT3-6-022-s001.pdf [file SCT3-6-022-s001.pdf]

1

2

3

4

5

6

7

## **SUPPLEMENTARY MATERIAL**

8

10 **Methods**11 *Isolation and culturing of neonatal rat ventricular myocytes*

12 Neonatal rat ventricular myocytes (NRVM) were isolated as follows. One to two days old Wistar  
13 rats were decapitated and the hearts were rapidly explanted. Atrial tissue was removed and  
14 ventricles were dissected into pieces and left to rotate overnight at 4 °C in HBSS (Gibco, Den  
15 Haag, Netherlands) containing trypsin (1 mg/mL; Becton Dickinson BV, Breda, The  
16 Netherlands). The following day the enzymatic effect of trypsin was inactivated with culture  
17 medium (M199 medium; Gibco; supplemented with 10% heat inactivated fetal bovine serum  
18 (FBS; Gibco), 1% HEPES ( Gibco #`5630-0-80), 5000 U/L penicillin-G (Sigma,#P7794), 2 mg/L  
19 vitamin B12 (Sigma, #V2876), 3,5 g/L glucose, 1% non-essential amino acids (Gibco, #11140-  
20 050), and 1% L-glutamine (Gibco,#25030-081)), ventricles were enzymatically dissociated in  
21 HBSS containing collagenase type 2 (1 mg/mL, Worthington Vollenhove, The Netherlands, 230  
22 units/mg) at 37 °C, centrifuged at 160 g, 5 minutes and cells were re-suspended in culture  
23 medium. To separate fibroblasts from cardiomyocytes, cells were pre-plated in a polystyrene  
24 treated T175 cell culture flask at 37°C in 5% CO<sub>2</sub>, 95% humidity and 21% O<sub>2</sub>. After two hours,  
25 non-adherent cells, i.e. predominantly NRVM, were collected and were seeded at  $1.4 \times 10^5/\text{cm}^2$   
26 onto microelectrode arrays (MEAs; Multi Channel Systems MCS GmbH, Reutlingen, Germany).  
27 This array has 60 integrated extracellular electrodes aligned in an 8 by 8 matrix at interelectrode  
28 distances of 0.7 mm. MEAs were coated with fibronectin (125 µg/ml BD Biosciences, Breda,  
29 The Netherlands) at least two hours prior to NRVM seeding. NRVM were cultured at 37 °C 5%  
30 CO<sub>2</sub>, 95% humidity and 21% O<sub>2</sub> in culture medium, which was switched to 2% FBS two days  
31 after cells were seeded on the MEA. The day after seeding, NRVM were washed twice with  
32 HBSS (Gibco) and fresh culture medium was added. Light microscopy was used to determine if

33 a confluent monolayer had formed in each of the cultures.

34

35 *Isolation and culture of adipose tissue-derived stromal cells*

36 ADSC were isolated and cultured as described previously (1). Adipose tissue was dissected  
37 from rats' inguinal fat (male, Wistar, 7-8 months), porcine (male, 3-4 months old, kindly provided  
38 by the department of experimental surgery of the AMC) or human subcutaneous abdominal fat  
39 (donated by healthy patients with body mass index below 30 ;Bergman Clinics, The  
40 Netherlands) and stored at 4 °C. Within 24 hours, the adipose tissue was minced and washed  
41 extensively with PBS. The tissue fragments were incubated in an equal volume of PBS with  
42 0.1% Collagenase A (Roche Diagnostics, Mannheim, Germany), containing 1% bovine serum  
43 albumin (BSA; Sigma-Aldrich, Boston, MA) at 37 °C for 1 hour while exposed to continuous  
44 shaking. The enzymatic activity of collagenase was stopped by adding PBS, 1% BSA and  
45 digested tissue were filtered through 70 µm filters. The collected cell suspension was subjected  
46 and centrifuged at 600xg for 10 min. The supernatant was discarded and stromal vascular  
47 fraction (SVF) was incubated with an erythrocyte lysis buffer at 4°C for 5 min. Then, SVF pellet  
48 was collected by additional centrifugation. Cells were suspended in culture medium that  
49 consisted of DMEM (Lonza Biowhittaker, Verviers, Belgium), supplemented with 10% FBS  
50 (Thermo Scientific, Hemel Hempstead, UK), 100 U/mL penicillin, 100 mg/mL streptomycin  
51 (Gibco, Invitrogen, Carlsbad, CA) and 2 mM L-glutamine (Lonza Biowhittaker, Verviers,  
52 Belgium). The ADSC were seeded at a density of  $4 \times 10^4$  cells/cm<sup>2</sup> and cultured at 37 °C, 5%  
53 CO<sub>2</sub>, 95% humidity and 21% O<sub>2</sub>. Culture medium was refreshed every two days till 80-90%  
54 confluence was reached. ADSC were propagated at a 1:2 ratio and used from passage 3  
55 onwards for the experiments. Cells were referred to either rat ADSC (rADSC) or human ADSC  
56 (hADSC) or pig ADSC (pADSC).

57 For conditioned medium; confluent flasks of ADSC were cultured in NRVM culture medium  
58 containing 2%, after twenty-four hours medium was collected, filtered through a 0.22 µm filter  
59 (MILLEX®GV SLGV033RS) labelled Cme-ADSC and stored at -20 °C until use.

60

### 61 Experimental conditions

62 Monolayers of NRVM containing ADSC were prepared by treating ADSC with mitomycin-C  
63 (Sigma M4287-2MG) and were labeled with CDFA-SE (Invitrogen Vybrand® CFDA SE Cell  
64 Tracer Kit) according to manufactures protocol. ADSC were collected using accutase (Gibco,  
65 A111105-01 StemPro®Accutase®), and centrifuged for 5 minutes at 160g. Supernatant was  
66 removed and the pellet was re-suspended in NRVM culture medium containing 2% FBS. ADSC  
67 were then added to monolayers of NRVM in cell ratios of NRVM:ADSC 1:1. Monolayers of  
68 NRVM serving as controls received fresh NRVM culture medium containing 2% FBS. Two days  
69 later electrical mapping was performed.

70 Medium from NRVM monolayers and the monolayers containing the different species of ADSC  
71 was collected after two days, filtered through a 0.22 µm filter (MILLEX®GV SLGV033RS) and  
72 stored at -20 °C until use. This medium was referred to as conditioned medium (Cme) and  
73 labeled as follows; Cme NRVM, and Cme NRVM:ADSC.

74 For the transwell setup monolayers were created in fibronectin coated T12 wells, as described  
75 above. On day 4, transwell inserts were placed inside the well and ADSC were seeded into  
76 these inserts. The ratio of NRVM:ADSC was 1:2 as the surface area of the inserts is smaller  
77 than the T12 wells. Two days later medium was collected, filtered, labelled Cme transwell ADSC  
78 and stored at -20 °C until used.

79 In the experiments investigating the paracrine effects, conditioned medium was added to  
80 monolayers of NRVM only, two days prior to electrical mapping.

81

### 82 Electrical mapping and microelectrode measurements

83 The MEAs containing the different cultures were positioned in a temperature controlled (37 °C  
84 MEA holder (TC01/02 Multichannel Systems MSC GmbH). Each MEA harbored 60 electrodes  
85 which had terminals in the core portion of the MEA (Supplemental Fig.1). On every day of  
86 experimentation two monolayers of NRVM from the same cell isolation served as controls. All  
87 cultures were stimulated from at least two stimulation sites using a bipolar extracellular stimulus  
88 electrode (twice diastolic stimulation threshold, 1 ms or 2 ms rectangular current pulses).

89 Unipolar electrograms were recorded with a 256-channel amplifier (BioSemi, ActiveTwo,  
90 Amsterdam, The Netherlands, 24 bit dynamic range, 122.07 nV LSB, total noise 0.5 µV).

91 Signals were recorded with a sampling frequency of 2048 Hz (filter setting of the amplifiers DC –  
92 400 Hz (- 3dB point). The recordings were made with respect to the integrated reference  
93 electrode of the MEA. Conduction velocity (CV) was determined from activation maps

94 constructed using the maximum negative dV/dt as activation time (AT; relative to the time of  
95 earliest activation) with the use of a custom made program (2) based on MATLAB R2006b (The  
96 MathWorks, Inc., Natick, MA, USA). CV was determined along lines perpendicular to isochronal  
97 lines by dividing the distance by the difference in local activation time. Lines had a length of at  
98 least 4 electrode distances. Local activation times in the figures are color coded in classes of 5

99 ms. CV was determined at a basic cycle length (BCL) of 600 ms or during spontaneous activity  
100 if pacing was not possible. Based on the method described by Lammers et al. (3) we quantified  
101 the heterogeneity in conduction as a measure of arrhythmia vulnerability. Maximum AT  
102 differences between each adjacent electrode quartet in the grid were obtained and the total  
103 range of maximal AT differences was plotted in a histogram.

104 Microelectrodes were pulled from glass capillaries (Harvard apparatus GC100F-10) and filled  
105 with 3 M KCl. An AgCl covered silver wire was used as a reference electrode. Following  
106 activation mapping, action potentials were recorded during pacing at BCL 600 ms. Resting  
107 membrane potential (RMP) was taken as the highest negative membrane potential recorded,  
108 upstroke velocity was taken as  $dV/dt$  max.

109

### 110 Immunostaining and fluorescence imaging

111 For immunofluorescence, cells ( $1.25 \times 10^5$  cells/cm<sup>2</sup>) were plated in 12-well plates (MP  
112 Biomedicals) containing fibronectin-coated (125 µg/ml BD Biosciences) coverslips and cultured  
113 under the same conditions as cells on MEAs.. Separate cultures were made as  
114 immunofluorescence could not be performed on MEAs. On the day of the electrophysiological  
115 recordings these cultures were fixed with 4% PFA for 10 minutes, permeabilized with 0.1%  
116 Triton X-100, and blocked with 1% BSA (Roche BSA fraction V #10735094001). Cells were  
117 stained with primary antibodies (mouse anti-sarcomeric-actinin primary antibody; Sigma  
118 1:1000), mouse anti-human monoclonal CD44 primary antibody (Lifespan Biosciences, LS-  
119 B1862; 1:250), rabbit anti Connexin 43 (Invitrogen 574366A; 1:200), rabbit anti Connexin 45  
120 (Santa Cruz Biotechnology, sc-25716, 1:100) and mouse anti N-Cadherin (Sigma C2542, 1:100)  
121 in 1% BSA overnight at room temperature, washed three times with PBS, and then incubated  
122 with secondary antibodies (Alexa Fluor-647 goat anti-mouse IgG (Life Technology, A21235;  
123 1:250), Alexa Fluor-488 goat anti-mouse/rabbit IgG (Life Technology, A11008/A21222; 1:250),  
124 for two hours in 1% BSA. Cover-slips were washed an additional three times in PBS and  
125 incubated for an additional 10 minutes with either cyto@orange (Life Technology, S11368,  
126 1:1000) or DAPI (Sigma, D9542, 1:40000), washed again with PBS and embedded in 50%  
127 glycerol/50% PBS. Examination was performed by Leica SPE confocal laser scanning and  
128 Leica Application Suite Advanced Fluorescence (LAS AF) software.

129 The images obtained from cultures stained for N-Cadherin and Cx43 were analyzed using  
130 Image J. Five to ten images were taken in each of three independent experiments, Image J was  
131 used to determine the number of pixels for either the Cx43 or N-cadherin channel in each  
132 image. Based on the number of pixels we then determined the ratio of Cx43: N-cadherin in each  
133 image.

134

### 135 **References**

- 136 1. Przybyt E, Krenning G, Brinker MG et al. Adipose stromal cells primed with hypoxia and  
137 inflammation enhance cardiomyocyte proliferation rate in vitro through STAT3 and  
138 Erk1/2. J Transl Med 2013;11:39.
- 139 2. Potse M, Linnenbank AC, Grimbergen CA. Software design for analysis of multichannel  
140 intracardial and body surface electrocardiograms. Comput Methods Programs Biomed  
141 2002;69:225-36.
- 142 3. Lammers WJ, Schalij MJ, Kirchhof CJ et al. Quantification of spatial inhomogeneity in  
143 conduction and initiation of reentrant atrial arrhythmias. Am J Physiol 1990;259:H1254-  
144 63.

145

146

147

148

149

150

151

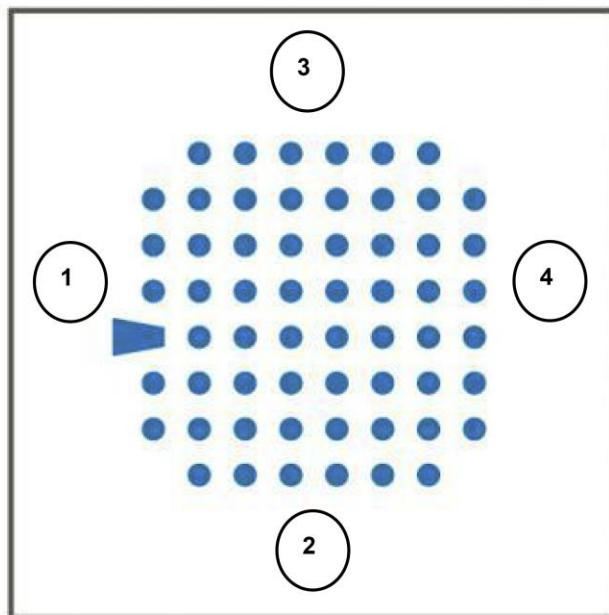

155 **Figure S1. Layout of the 60 electrodes in the MEA.** Each electrode has a diameter of 100  $\mu\text{m}$  and an

156 interelectrode distance of 700  $\mu\text{m}$ . Numbers 1-4 represent stimulation positions.



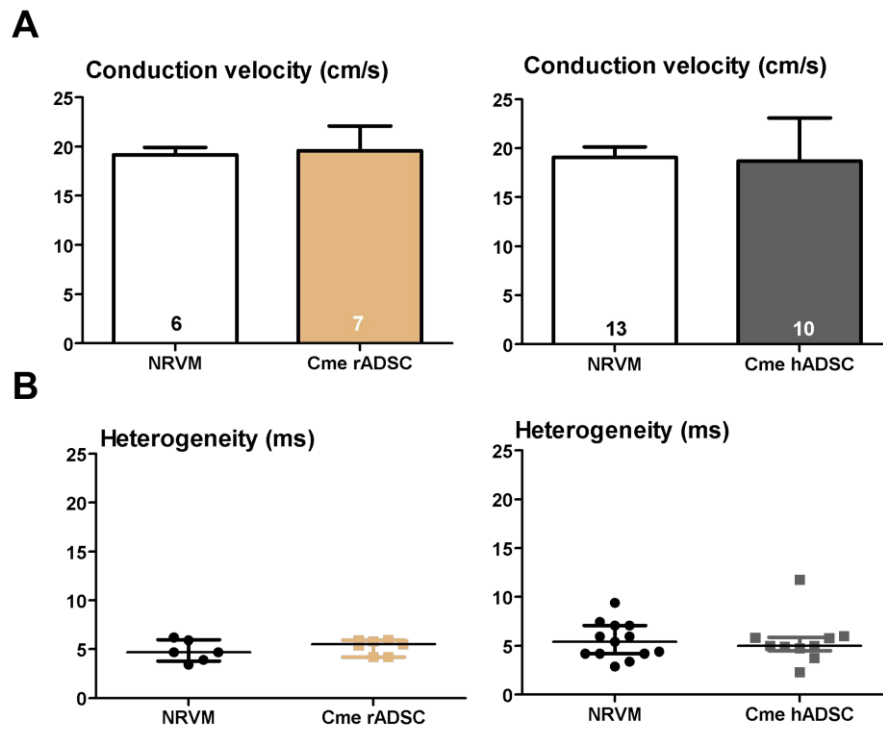

158

159

**Figure S2. Effect of Cme rADSC and Cme hADSC on monolayers of NRVM.** Bar graphs illustrating the

160

effects on **A**: conduction velocity and **B**: conduction heterogeneity in monolayers of NRVM cultured in

161

condition medium obtained from rADSC and hADSC cultures.

162

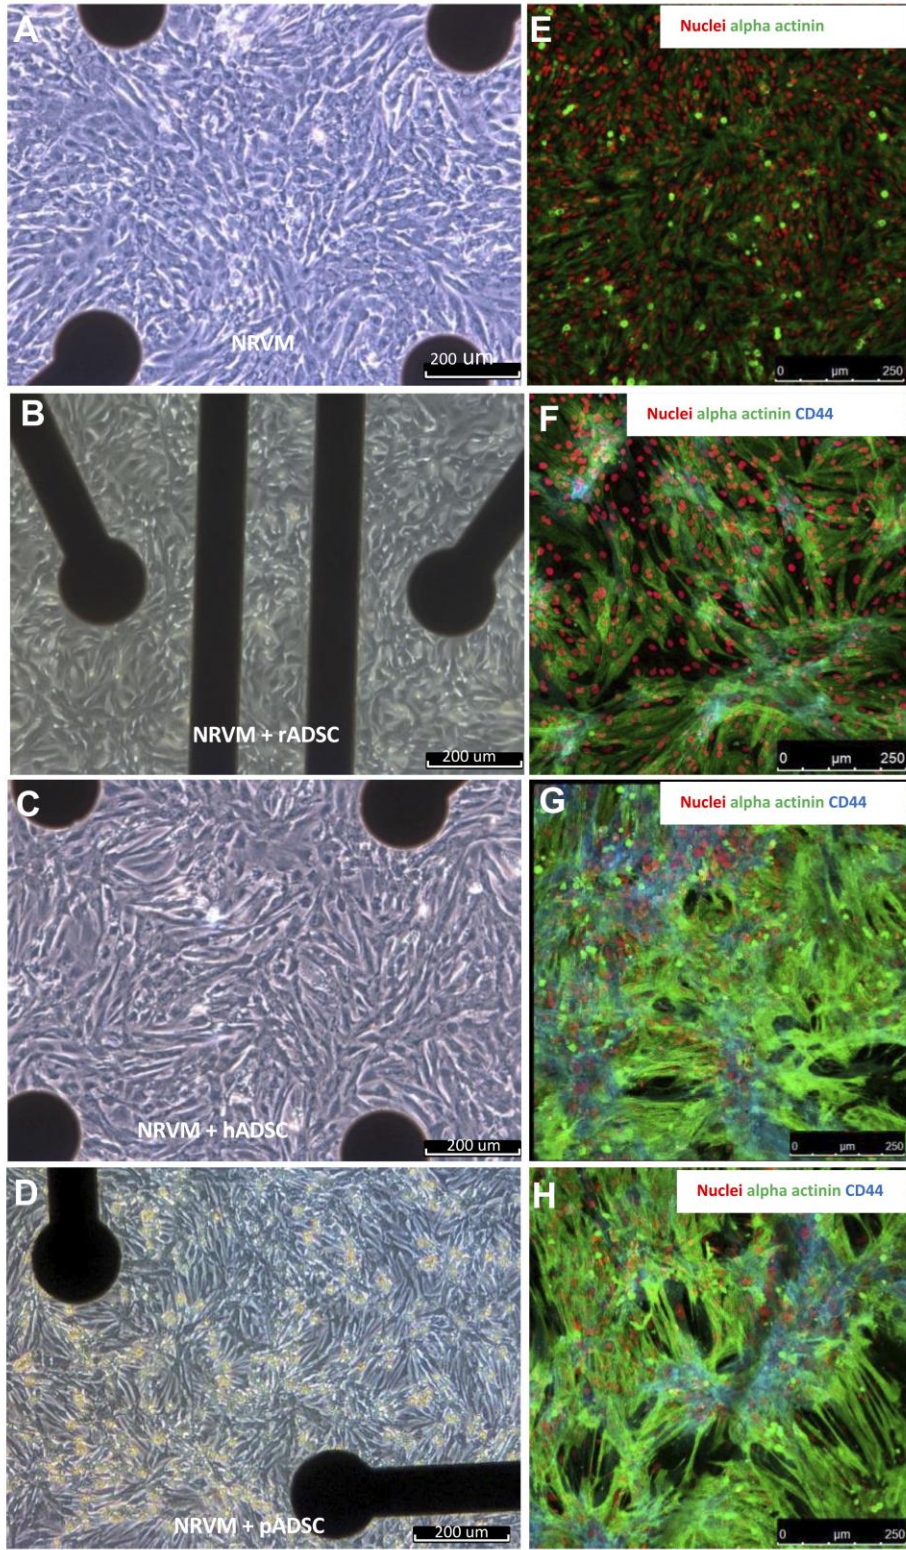

164 **FigureS 3. Micrographs of the various cultures.** Transmitted light and immune-fluorescent micrographs.  
 165 **A –D:** Transmitted light micrographs of NRVM monolayer and NRVM monolayers co-cultured with the  
 166 different ADSC. Black dots and lines are the electrodes in the MEA. **E-H:** Immune-fluorescent  
 167 micrographs of NRVM monolayer and NRVM monolayers co-cultured with the different ADSC. Please  
 168 note that these are not the same monolayers as panels A-D. Scale bars located at the bottom right of  
 169 each image indicate size in  $\mu\text{m}$ .  
 170

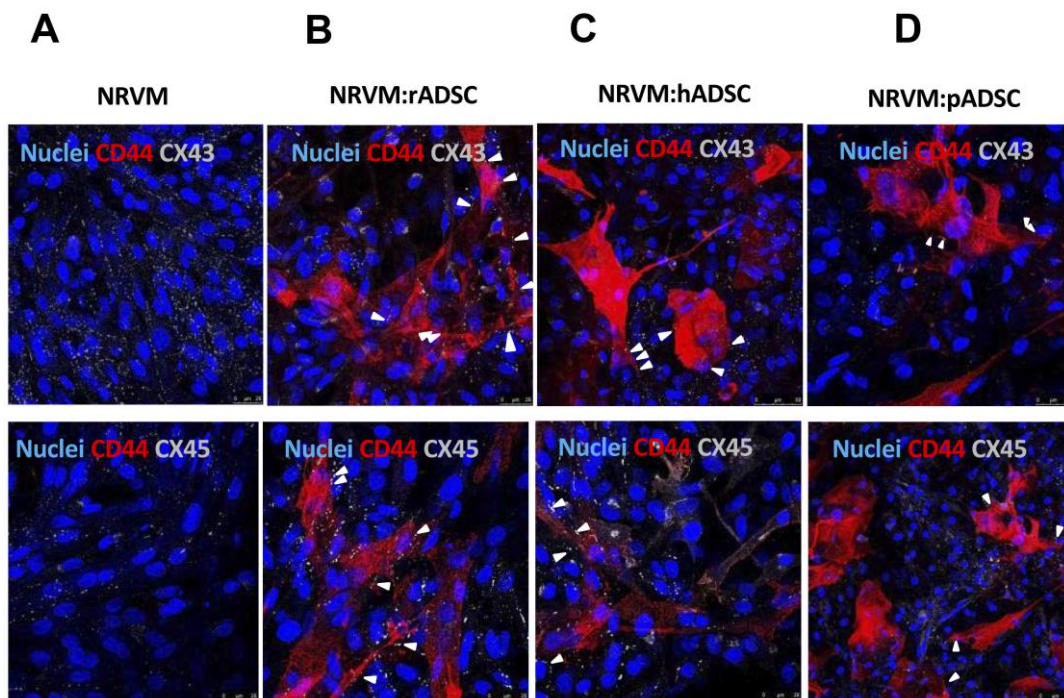

171  
 172 **Figure S4. Immunofluorescence micrographs of the various cultures stained with CD44 and Cx43 and**  
 173 **Cx45.** Monolayers of NRVM are stained with CD44 and Cx43 (**A1**) and with CD44 and Cx45 (**A2**).  
 174 Monolayers of NRVM co-cultured with rADSC (**B1+B2**), NRVM monolayers co-cultured with hADSC  
 175 (**C1+C2**) or pADSC (**D1+D2**) are stained for the same markers. Scale bars located at the bottom right of  
 176 each image indicate size in  $\mu\text{m}$ .
